# Supplementary material
Source: ML conference proceedings conference paper supplement (https://openaccess.thecvf.com/content/CVPR2021/html/Tan_Equalization_Loss_v2_CVPR_2021_paper.html)
Supplement: Supplementary file 1 [file Tan_Equalization_Loss_v2_CVPR_2021_supplemental.pdf]

# Supplementary Materials for Equalization Loss v2: A New Gradient Balance Approach for Long-tailed Object Detection

Jingru Tan<sup>1</sup> Xin Lu<sup>2</sup> Gang Zhang<sup>3</sup>

Changqing Yin<sup>1</sup> Quanquan Li<sup>2</sup>

<sup>1</sup>Tongji University <sup>2</sup>SenseTime Research <sup>3</sup>Tsinghua University

{tjr120,yinchangqing}@tongji.edu.cn, {luxin,liquanquan}@sensetime.com

zhang-g19@mails.tsinghua.edu.cn

## 1. Mapping Function Types

In Table 1, we make the comparison among several variant mapping functions. Results show that our proposed sigmoid-like mapping function achieves the highest AP.

| type                    | neg $\checkmark$ |                 |                 |                 | neg $\checkmark$ pos $\checkmark$ |                 |                 |                 |
|-------------------------|------------------|-----------------|-----------------|-----------------|-----------------------------------|-----------------|-----------------|-----------------|
|                         | AP               | AP <sub>r</sub> | AP <sub>c</sub> | AP <sub>f</sub> | AP                                | AP <sub>r</sub> | AP <sub>c</sub> | AP <sub>f</sub> |
| sqrt ( $y = \sqrt{x}$ ) | 18.4             | 2.1             | 17.6            | 28.2            | 21.4                              | 6.2             | 21.0            | 28.6            |
| linear ( $y = x$ )      | 18.8             | 2.0             | 16.9            | 28.3            | 22.6                              | 10.0            | 22.0            | 28.7            |
| exp ( $y = x^2$ )       | 19.1             | 2.1             | 17.6            | 28.2            | 23.2                              | 11.9            | 22.7            | 28.8            |
| ours                    | 19.7             | 7.3             | 17.6            | 27.6            | 23.7                              | 14.9            | 22.8            | 28.6            |

Table 1: Comparison between different mapping functions

## 2. More Ablations of Hyper-Params

We have conducted more ablation studies of  $\mu$  and  $\gamma$ , and the experiment results are presented in Table 2. Since  $\mu$  represents the value which we think as a high enough gradient ratio, lowering its values significant degrades the accuracy. It is better to choose a higher value for it, *e.g.*, 0.8, 0.9.  $\gamma$  is more robust when  $\mu$  is in a reasonable range.

| $\gamma$ | $\mu$ | AP   | AP <sub>r</sub> | AP <sub>c</sub> | AP <sub>f</sub> |
|----------|-------|------|-----------------|-----------------|-----------------|
| 10       | 0.4   | 20.4 | 5.7             | 19.0            | 28.4            |
| 10       | 0.5   | 21.6 | 9.6             | 20.1            | 28.5            |
| 10       | 0.6   | 22.4 | 11.8            | 21.1            | 28.6            |
| 5        | 0.8   | 23.1 | 12.4            | 22.4            | 28.7            |
| 15       | 0.8   | 23.2 | 15.0            | 22.0            | 28.1            |
| 20       | 0.8   | 22.3 | 15.4            | 20.6            | 27.3            |

Table 2: More Ablations of  $\gamma$  and  $\mu$ .
